# Supplementary material for: Behavioral, neurochemical, and neuroimmune changes associated with social buffering and stress contagion
Source: PubMed Central journal article supplement — Neurobiol Stress. 2022 Jan 4;16:100427. doi: 10.1016/j.ynstr.2022.100427 (PMC8749234; doi:10.1016/j.ynstr.2022.100427), 2022-01-04
Supplement: mmc1.pdf [file mmc1.pdf]

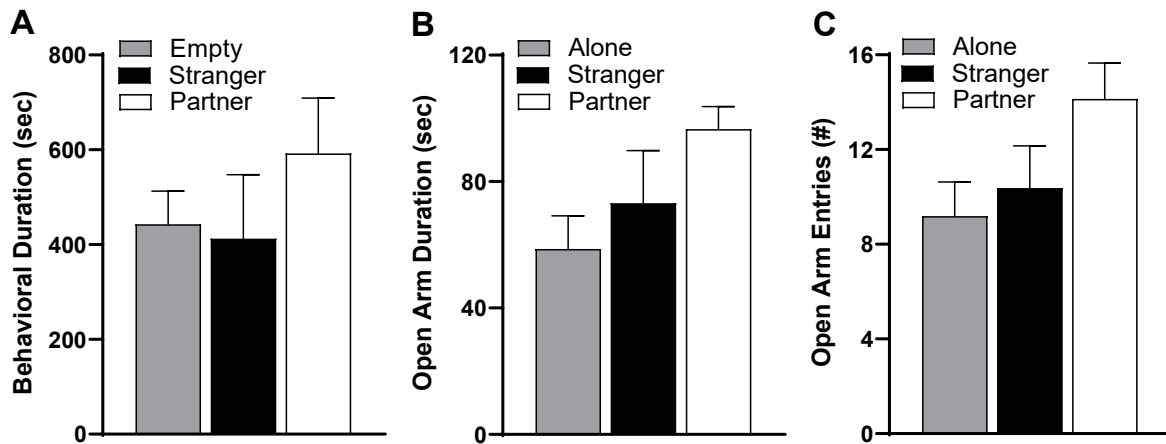

**Figure S1.** Behaviors of female and male voles during the immobilization (IMO) test and the subsequent elevated plus maze (EPM) test, respectively. During the IMO test (A), free-moving females in the cage tended to spend more time interacting (including sniffing, in contact with, and biting/pulling the restrainer) with the restrainer containing the stressed male partner (Partner, n=9), compared to the Empty restrainer (n=10) or the restrainer containing a stressed male stranger (Stranger, n=9). During the EPM test following the IMO stress, males who had their female partner (Partner, n=7) in the cage during the IMO stress tended to spend more time in the open arms (B) and entered the open arms more frequently (C), compared to males who experienced IMO alone (Alone, n=8) or with a female stranger (Stranger, n=8) in the cage. Although no significant group differences were found, these behavioral data seem to indicate that the free-moving female did not spend as much time with a stranger male in the restrainer, whereas IMO males under Alone and Stranger conditions displayed lower levels of anxiety-like behaviors compared to IMO males under Partner condition.
